# Supplementary material for: Frameshift Variant in AMPD2 in Cirneco dell’Etna Dogs with Retinopathy and Tremors
Source: MDPI journal article supplement (doi:10.3390/genes15020238), 2024-02-13
Supplement: s1 [file s1]

# B
